# Supplementary material for: Clinical features of sodium-taurocholate cotransporting polypeptide deficiency in pediatric patients: case series and literature review
Source: PubMed Central journal article supplement — Transl Pediatr. 2021 Apr;10(4):1045–54. doi: 10.21037/tp-20-360 (PMC8107837; doi:10.21037/tp-20-360), 2021-04
Supplement: tp-10-04-1045-supplementary.pdf [file tp-10-04-1045-supplementary.pdf]

**Table S1** The genes related to inherited metabolic liver disorders

|          |          |          |          |          |          |          |          |
|----------|----------|----------|----------|----------|----------|----------|----------|
| AARS2    | AASS     | ABCA1    | ABCB11   | ABCB4    | ABCC2    | ABCD1    | ABCD3    |
| ABCG5    | ABCG8    | ABHD5    | ACAD9    | ACADM    | ACADS    | ACADVL   | ACAT1    |
| ACOX1    | ACOX2    | ACVRL1   | ADA      | ADA2     | ADAMTSL2 | ADK      | AGA      |
| AGL      | AGPAT2   | AGPS     | AGXT     | AHCY     | AIFM1    | AIRE     | AKR1D1   |
| AKT2     | ALAD     | ALAS2    | ALDH2    | ALDOA    | ALDOB    | ALG1     | ALG11    |
| ALG12    | ALG13    | ALG2     | ALG3     | ALG6     | ALG8     | ALG9     | ALMS1    |
| ALPL     | AMACR    | AMT      | ANGPTL3  | ANK1     | ANKS6    | AP1S1    | APCS     |
| APOA1    | APOA5    | APOE     | APOPT1   | ARG1     | ARSA     | ARSB     | ASAH1    |
| ASL      | ASS1     | ATP13A2  | ATP5A1   | ATP6AP1  | ATP7B    | ATP8B1   | ATPAF2   |
| B2M      | B4GALT1  | BAAT     | BCAP31   | BCKDHA   | BCKDHB   | BCS1L    | BLVRA    |
| BMP2     | BMPER    | BOLA3    | BRAF     | BSCL2    | BTD      | C12orf65 | C15ORF41 |
| C1QBP    | CALM1    | CALM2    | CALM3    | CARS2    | CASP10   | CAT      | CAVIN1   |
| CBS      | CC2D2A   | CCDC115  | CCND1    | CD40LG   | CDAN1    | CDKN1C   | CEP164   |
| CEP19    | CEP41    | CEP83    | CFAP53   | CFC1     | CFTR     | CIITA    | CLDN1    |
| CLN3     | CLN5     | CLN6     | CLN8     | COA7     | COG1     | COG2     | COG4     |
| COG5     | COG6     | COG7     | COG8     | COQ2     | COX10    | COX14    | COX15    |
| COX20    | COX6B1   | COX8A    | CP       | CPOX     | CPS1     | CPT1A    | CPT2     |
| CSPP1    | CTC1     | CTLA4    | CTNS     | CTSC     | CTSD     | CTSF     | CYBA     |
| CYC1     | CYP27A1  | CYP7B1   | DBT      | DCDC2    | DCLRE1C  | DDC      | DDOST    |
| DGUOK    | DHCR7    | DHDDS    | DHFR     | DKC1     | DLD      | DNAJC5   | DOLK     |
| DPAGT1   | DPM1     | DPM2     | DPM3     | DPYS     | DYNC2H1  | DYNC2LI1 | EARS2    |
| EIF2AK3  | ELAC2    | ENG      | ENO3     | EPHX1    | EPM2A    | ETFA     | ETFB     |
| ETFDH    | EXTL3    | F8       | F9       | FADD     | FAH      | FAM111A  | FAN1     |
| FARS2    | FAS      | FASLG    | FASTKD2  | FBP1     | FBXL4    | FCGR2A   | FECH     |
| FERMT3   | FGA      | FGB      | FGG      | FH       | FIG4     | FOXRED1  | FTH1     |
| FUCA1    | FXN      | G6PC     | G6PC3    | G6PD     | GAA      | GALC     | GALE     |
| GALK1    | GALNS    | GALT     | GANAB    | GATA6    | GBA      | GBE1     | GCH1     |
| GCSH     | GDF1     | GDF2     | GFM1     | GLA      | GLB1     | GLDC     | GLIS2    |
| GLIS3    | GLUD1    | GM2A     | GNE      | GNMT     | GNPAT    | GNPTAB   | GNPTG    |
| GPD1     | GRN      | GSN      | GSTZ1    | GUCY2D   | GUSB     | GYG1     | GYS1     |
| GYS2     | H19      | HADH     | HADHA    | HADHB    | HAMP     | HBB      | HEXA     |
| HEXB     | HFE      | HFE2     | HGD      | HGSNAT   | HLA-DRB1 | HMBS     | HMGCL    |
| HNF1B    | HNF4A    | HPD      | HSD17B4  | HSD3B7   | HYAL1    | IARS     | IDS      |
| IDUA     | IER3IP1  | IFT122   | IFT140   | IFT172   | IFT43    | IFT80    | IFT81    |
| IL21R    | IL2RA    | IL31RA   | IL7R     | INVS     | ITCH     | ITK      | JAG1     |
| KCNH1    | KCNQ1OT1 | KCTD7    | KHK      | KIAA0586 | KRAS     | KRT18    | KRT8     |
| KYNU     | LAMP2    | LARS     | LARS2    | LBR      | LDHA     | LDHB     | LIPA     |
| LIPF     | LIPI     | LIPT1    | LMNA     | LPL      | LRPPRC   | LYRM4    | LYRM7    |
| LYZ      | LZTR1    | MAN2B1   | MANBA    | MARS     | MAT1A    | MCEE     | MCOLN1   |
| MDH2     | MEGF8    | MFSD8    | MGAT2    | MGME1    | MKS1     | MMAA     | MMAB     |
| MMACHC   | MMADHC   | MMP21    | MOGS     | MPDU1    | MPI      | MPV17    | MRPL3    |
| MRPL44   | MRPS16   | MRPS22   | MRPS7    | MT1B     | MTFMT    | MTHFD1   | MTO1     |
| MTPP     | MUC5B    | MUT      | MVK      | MYO5B    | NAGA     | NAGLU    | NAGS     |
| NARS2    | NAT2     | NBAS     | NCF1     | NCF2     | NDUFA10  | NDUFA12  | NDUFA4   |
| NDUFA9   | NDUFAP2  | NDUFAP6  | NDUFS3   | NDUFS7   | NDUFS8   | NEK1     | NEK8     |
| NEU1     | NFE2L2   | NGLY1    | NHLRC1   | NHP2     | NOP10    | NOTCH2   | NPC1     |
| NPC2     | NPHP1    | NPHP3    | NPHP4    | NR1H4    | NSMCE2   | OCLN     | OFD1     |
| OSMR     | OTC      | PAH      | PC       | PCCA     | PCCB     | PCK1     | PDHA1    |
| PET100   | PEX1     | PEX10    | PEX11B   | PEX12    | PEX13    | PEX14    | PEX16    |
| PEX19    | PEX2     | PEX26    | PEX3     | PEX5     | PEX6     | PEX7     | PFKM     |
| PGAM2    | PGK1     | PGM1     | PHKA1    | PHKA2    | PHKB     | PHKG1    | PHKG2    |
| PHYH     | PIBF1    | PIEZO1   | PIGA     | PKD1     | PKD2     | PKHD1    | PKLR     |
| PMM2     | PNPLA2   | PNPT1    | POLD1    | POLG     | POLG2    | POMC     | PPARG    |
| PPT1     | PRDX1    | PRF1     | PRKAG2   | PRKCSH   | PRODH    | PSAP     | PSMB8    |
| PTF1A    | PTPN11   | PTPRC    | PTS      | PYGL     | PYGM     | RAF1     | RAG1     |
| RAG2     | RBCK1    | RFT1     | RFX5     | RFX6     | RFXANK   | RFXAP    | RHAG     |
| RIT1     | RMND1    | RNASEH2A | RPGRIP1L | RRM2B    | SAMHD1   | SAR1B    | SC5D     |
| SCN9A    | SCO1     | SCP2     | SCYL1    | SDHA     | SDHAF1   | SDHD     | SEC63    |
| SERAC1   | SERPINA1 | SFTPA1   | SFTPA2   | SFXN4    | SGSH     | SH2D1A   | SHANK3   |
| SKIV2L   | SLC10A1  | SLC10A2  | SLC11A2  | SLC17A5  | SLC22A5  | SLC25A13 | SLC25A15 |
| SLC25A20 | SLC25A4  | SLC27A5  | SLC29A3  | SLC2A2   | SLC30A10 | SLC35A1  | SLC35A2  |
| SLC35C1  | SLC37A4  | SLC39A8  | SLC40A1  | SLC52A3  | SLC6A19  | SLC7A7   | SLCO1B1  |
| SLCO1B3  | SMPD1    | SOS1     | SOS2     | SP110    | SPRNTN   | SRD5A3   | ST3GAL5  |
| STN1     | STT3A    | STT3B    | STX11    | STXBP2   | SUCLA2   | SUCLG1   | SUMF1    |
| SURF1    | SYNJ1    | TACO1    | TALDO1   | TARS2    | TAT      | TAZ      | TCIRG1   |
| TCTEX1D2 | TERC     | TERT     | TF       | TFAM     | TFR2     | TGFB1    | TJP2     |
| TK2      | TMEM107  | TMEM165  | TMEM199  | TMEM216  | TMEM67   | TPP1     | TRAF3IP1 |
| TRAPPC11 | TREX1    | TRIM37   | TRMT10C  | TRMU     | TFSM     | TTC21B   | TTC37    |
| TTPA     | TTR      | TUFM     | TWINK    | UBR1     | UGT1A1   | UNC13D   | UPB1     |
| UQC2     | UQCRB    | UQCRC2   | UQCRCQ   | UROC1    | UROD     | UROS     | USP18    |
| UTP4     | VARS2    | VHL      | VIL1     | VIPAS39  | VPS33B   | WDR19    | WDR34    |
| WDR35    | WDR60    | XPNPEP3  | YARS2    | ZNF423   |          |          |          |

**Table S2** The biochemical results during follow-up

| No.        | Time, yyyy.<br>mm.dd | TBA,<br>μmol/L | ALT,<br>U/L | AST,<br>U/L | GGT,<br>U/L | TB,<br>μmol/L | DB,<br>μmol/L | BU,<br>μmol/L | ALB,<br>g/L | TG,<br>μmol/L | TC,<br>μmol/L | VD,<br>ng/mL | NH3,<br>μmol/L |
|------------|----------------------|----------------|-------------|-------------|-------------|---------------|---------------|---------------|-------------|---------------|---------------|--------------|----------------|
| P1         | 2018.08.25           | 170.0          | 34          | 47          | 37          | 38.5          | 12.8          | 25.7          | 44.9        |               |               |              |                |
|            | 2018.10.09           | 90.3           | 43          | 54          | 23          | 22.5          | 7.2           | 15.3          | 46.6        |               |               |              |                |
|            | 2018.11.19           | 108.0          | 43          | 62          | 18          | 13.4          | 4.6           | 8.8           | 51.8        |               |               |              |                |
|            | 2018.12.20           | 105.9          | 37          | 64          | 14          | 17.1          | 5.0           | 12.1          | 54.8        |               |               |              |                |
|            | 2018.12.26           | 104.2          | 30          | 43          | 12          | 11.9          | 4.4           | 7.5           | 45.3        | 0.79          | 4.15          | 36.8         | 13.0           |
|            | 2019.01.20           | 103.7          | 32          | 59          | 13          | 9.4           | 3.8           | 5.6           | 50.8        |               |               |              |                |
|            | 2019.03.26           | 96.7           | 32          | 52          | 15          | 13.1          | 4.2           | 8.9           | 52.1        |               |               |              |                |
|            | 2020.09.09           | 120.5          | 25          | 39          | 9           | 8.8           | 3.8           | 5.0           | 44.6        |               |               |              |                |
| P2         | 2016.07.12           | 107.6          | 13          | 35          | 9           | 8.9           | 4.3           | 4.6           | 45.2        |               |               |              |                |
|            | 2016.08.29           | 128.7          | 9           | 29          | 9           | 16.5          | 7.9           | 8.6           | 45.4        |               |               |              |                |
|            | 2019.02.25           | 151.6          | 16          | 33          | 8           | 19.0          | 7.0           | 12.0          | 43.5        |               |               |              |                |
|            | 2019.03.07           | -              | 10          | 24          | 9           | 9.3           | 3.8           | 5.5           | 41.8        | 0.7           | 2.7           |              | 24             |
|            | 2019.03.08           | 148.1          |             |             |             |               |               |               |             |               |               |              |                |
|            | 2019.05.23           | 256.4          | 8           | 26          | 9           | 11.8          | 4.3           | 7.5           | 42.9        |               |               |              |                |
|            | 2019.06.27           | 71.8           | 9           | 26          | 7           | 26.1          | 9.0           | 17.1          | 43.1        |               |               |              |                |
|            | 2019.08.02           | 159.3          | 6           | 23          | 11          | 17.1          | 6.8           | 10.3          | 44.2        |               |               |              |                |
|            | 2020.04.19           | 90.4           | 8           | 29          | 8           | 27.1          | 8.4           | 18.7          | 47.1        |               |               |              |                |
|            | P3                   | 2018.08.12     | 69.4        | 30          | 42          | 23            | 29.5          | 9.3           | 20.2        | 41.7          |               |              |                |
| 2018.12.12 |                      | 158.7          | 29          | 51          | 11          | 10.5          | 4.5           | 6.0           | 48.8        |               |               |              |                |
| 2019.01.16 |                      | 104.8          | 13          | 39          | 11          | 10.8          | 3.4           | 7.4           | 47.3        |               |               |              |                |
| 2019.02.22 |                      | 21.2           | 19          | 45          | 8           | 12.1          | 4.4           | 7.7           | 47.8        |               |               |              |                |
| 2019.03.20 |                      | 24.2           | 17          | 39          | 12          | 7.0           | 1.4           | 5.6           | 45.2        |               |               |              |                |
| 2019.04.19 |                      | 49.4           | 16          | 43          | 10          | 8.3           | 2.6           | 5.7           | 48.8        |               |               |              |                |
| 2019.04.23 |                      | 41.7           | 13          | 41          | 9           | 5.5           | 2.3           | 3.2           | 47.6        |               |               |              | 48             |
| 2019.08.22 |                      | 79.2           | 26          | 44          | 10          | 8.7           | 3.3           | 5.4           | 47.0        |               |               |              |                |
| 2021.01.09 |                      | 29.7           | 11          | 37          | 12          | 10.1          | 2.5           | 7.6           | 54          |               |               |              |                |
| P4         | 2019.04.25           | 180            | 75          | 112         | 249         | 79.6          |               | 21.6          | 33.6        |               |               | <8.0         | 49             |
|            | 2019.05.03           | 212.9          | 37          | 68          | 316         | 39.1          | 31.0          | 8.1           | 34.4        |               |               |              |                |
|            | 2019.05.25           | -              | 15          | 32          | 95          | 11.9          |               | 4.9           | 40.3        |               |               | 22.5         | 47             |
| P5         | 2020.02.26           | 297.6          | 36          | 65          | -           | 81.2          | 5.4           | 75.8          | -           |               |               |              |                |
|            | 2020.03.04           | 162.4          | 29          | 36          | -           | 41.4          | 2.4           | 39.0          | 42.2        |               |               |              |                |
|            | 2020.04.03           | 228.8          | 17          | 37          | -           | 28.6          | 7.7           | 20.9          | 42.2        |               |               |              |                |
| P6         | 2019.01.07           | 57.5           | 64          | 82          | 25          | 12.9          | 5.2           | 7.7           | 54.0        |               |               |              |                |
|            | 2019.02.27           | 42.2           | 28          | 41          | 18          | 8.3           | 3.1           | 5.2           | 47.3        |               |               |              |                |
|            | 2019.03.26           | 66.9           | 28          | 47          | 13          | 5.2           | 2.1           | 3.1           | 46.4        |               |               |              |                |
|            | 2019.04.28           | 35.3           | 15          | 39          | 16          | 3.5           | 1.6           | 1.9           | 42.5        |               |               |              |                |
|            | 2019.05.28           | 24.5           | 38          | 66          | 16          | 9.3           | 2.9           | 6.4           | 46.8        |               |               |              |                |
|            | 2019.06.27           | 29.7           | 23          | 39          | 12          | 10.7          | 3.4           | 7.3           | 43.3        |               |               |              |                |
|            | 2019.07.25           | 32.5           | 19          | 47          | 10          | 7.3           | 2.1           | 5.2           | 44.4        |               |               |              |                |
|            | 2021.01.09           | 6.1            | 20          | 46          | 13          | 7.1           | 0.01          | 7.09          | 45.5        |               |               | 27.26        |                |
| P7         | 2018.12.29           | 74.1           | 26          | 43          | 90          | 30.8          | 13.1          | 17.7          | 35.4        |               |               |              |                |
|            | 2019.03.01           | 123.1          | 35          | 49          | 24          | 12.7          | 4.8           | 7.9           | 49.1        |               |               |              |                |
|            | 2019.04.14           | 76.0           | 33          | 45          | 15          | 6.6           | 2.9           | 3.7           | 42.9        |               |               |              |                |
|            | 2019.06.04           | 31.2           | 64          | 65          | 17          | 7.9           | 2.6           | 5.3           | 47.3        |               |               |              |                |
|            | 2019.08.12           | 49.6           | 19          | 40          | <6          | 7.6           | 2.8           | 4.8           | 41.9        |               |               |              |                |
| P8         | 2019.09.24           | 93.3           | 10          | 26          | <6          | 8.0           | 2.4           | 5.6           | 43.0        |               |               |              |                |
|            | 2020.09.29           | 47.9           | 12          | 31          | 9           | 13.6          | 2.5           | 11.1          | 43.9        |               |               |              |                |
| P9         | 2019.07.07           | 82.6           | 39          | 53          | 26          | 11.1          | 3.3           | 7.8           | 40.1        |               |               |              |                |
|            | 2019.08.15           | 60.4           | 37          | 53          | 13          | 9.2           | 2.8           | 6.4           | 43.8        |               |               |              |                |
|            | 2019.09.19           | 85.8           | 42          | 60          | 11          | 7.1           | 2.6           | 4.5           | 46.5        |               |               |              |                |
|            | 2019.10.20           | 117.3          | 34          | 57          | 13          | 8.7           | 3.1           | 5.6           | 51.7        |               |               |              |                |
|            | 2020.08.28           | -              | 19          | 45          | 7           | 9.5           | 2.7           | 6.8           | 49.0        |               |               |              |                |
| P10        | 2019.12.27           | 43.1           | 21          | 37          | 16          | 11.5          | 5.3           | 6.2           | 44.5        | 0.77          | 2.73          |              | 36.5           |
|            | 2021.01.05           | 97.99          | 19.7        | 41.5        | 11.6        | 12.1          | 4.9           | 7.2           | 42.3        |               |               | 28.86        |                |
| P11        | 2018.09.19           | 107.6          | 18          | 44          | 15          | 7.3           | 2.0           | 5.3           | 46.6        |               |               |              |                |
|            | 2020.03.18           | 86.3           | 10          | 29          | 8           | 4.4           | 1.3           | 3.1           | 35.4        | 1.16          | 3.66          | 27.3         |                |
| P12        | 2020.04.10           | 26.5           | 31          | 45          | 9           | 11.2          | 3.0           | 8.2           | 43.8        |               |               |              |                |
|            | 2020.04.20           | 75.1           | 25          | 43          | 7           | 7.3           | 2.3           | 5.0           | 45.4        |               |               |              |                |
|            | 2020.05.22           | 51.2           | 22          | 44          | 10          | 8.1           | 2.8           | 5.3           | 45.8        |               |               |              |                |
|            | 2020.07.17           | 80.3           | 44          | 54          | 17          | 10.6          | 3.3           | 7.3           | 47.6        |               |               |              |                |
|            | 2020.07.21           | 71.9           | 23          | 42          | 12          | 6.0           | 1.7           | 4.3           | 46.7        |               |               | 33.7         |                |
